# Supplementary material
Source: publisher figshare collection journal article supplement (https://acs.figshare.com/ndownloader/files/4398082)
Supplement: Supplementary file 1 [file 4398082]

# Supporting Information

## Visible-Light Induced Photocatalytic Degradation of Rhodamine B on One-Dimensional Iron Oxide Particles

Xuemei Zhou,<sup>†</sup> Hongchao Yang,<sup>‡</sup> Chenxuan Wang,<sup>†</sup> Xiaobo Mao,<sup>†</sup>  
Yinshu Wang,<sup>‡</sup> Yanlian Yang,<sup>†</sup> Gang Liu<sup>\*,†</sup>

<sup>†</sup>National Center for Nanoscience and Technology  
Beijing, 100190 (P. R. China)

<sup>‡</sup>Department of Physics, Beijing Normal University  
Beijing, 100875 (P. R. China)

\*To whom all correspondence should be addressed.

E-mail: liug@nanoctr.cn

Fax: (+86) 10-62656765

<sup>†</sup>National Center for Nanoscience and Technology.

<sup>‡</sup>Beijing Normal University.

## Figure Captions

**Figure S1.** High-resolution TEM image (a) and corresponding HAADF-STEM image (b) of  $\alpha$ -Fe<sub>2</sub>O<sub>3</sub> NRs. The variations of contrast in the images indicate the porous structure.

**Figure S2.** Micro-Raman spectra for 1D iron oxides before and after photocatalytic reaction. (a)  $\alpha$ -FeOOH MRs. (b)  $\alpha$ -Fe<sub>2</sub>O<sub>3</sub> MRs. (c)  $\alpha$ -FeOOH NRs. (d)  $\alpha$ -Fe<sub>2</sub>O<sub>3</sub> NRs.

**Figure S3.** Schematic diagram of a needle shaped goethite nanorod.

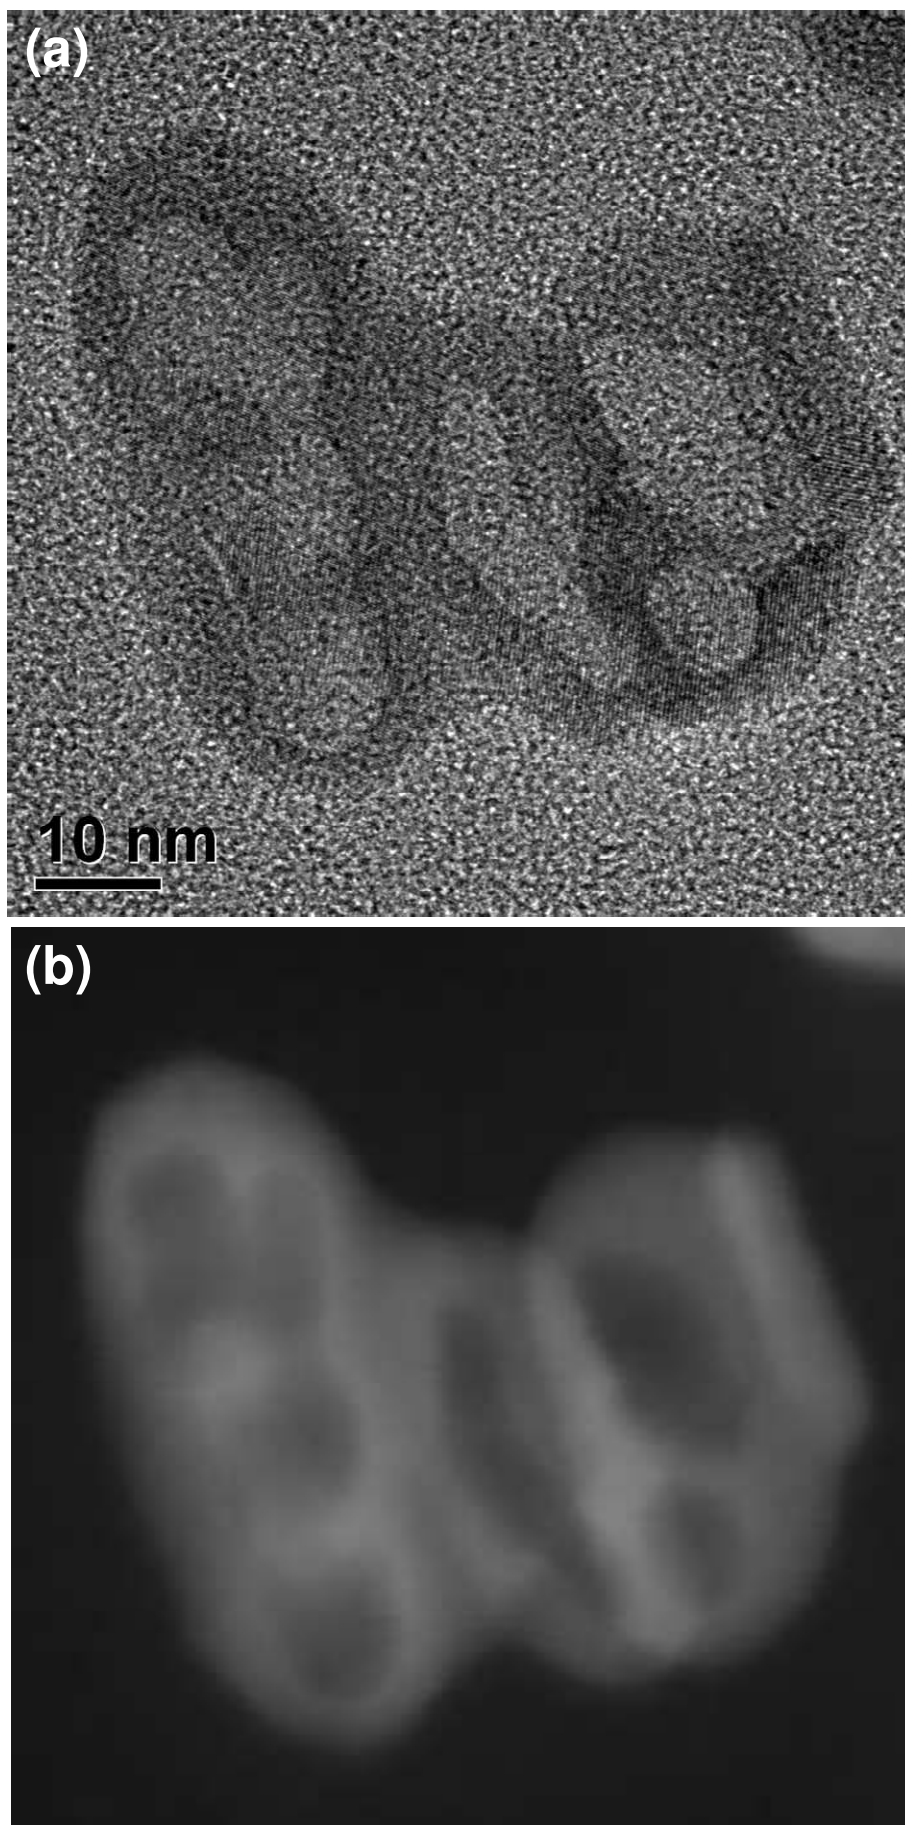

**Figure S1**

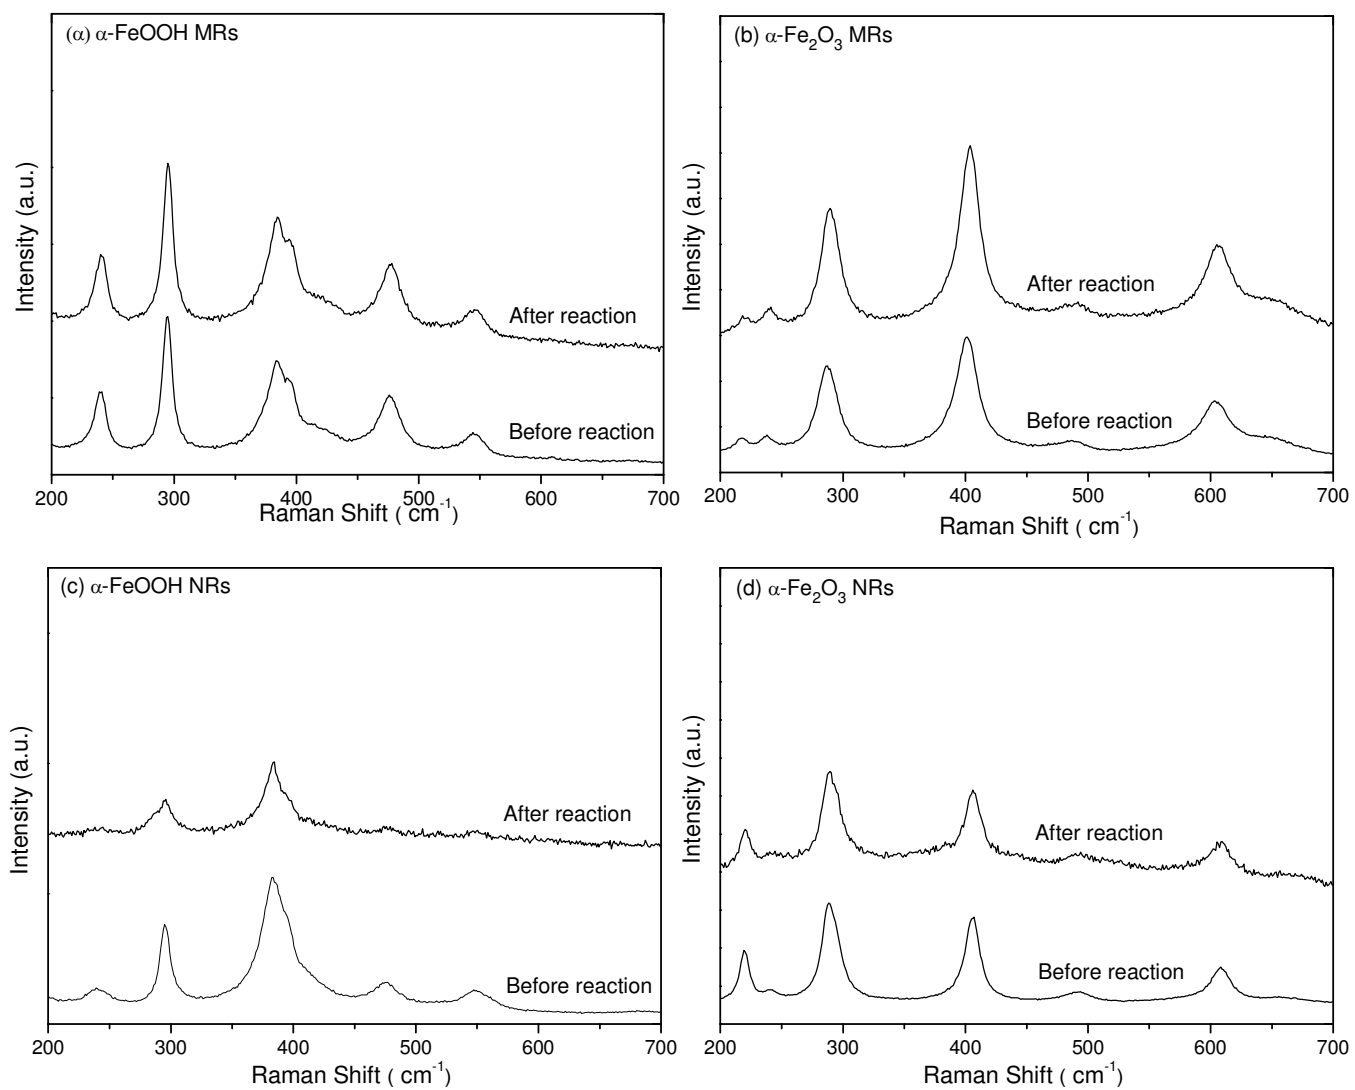

**Figure S2**

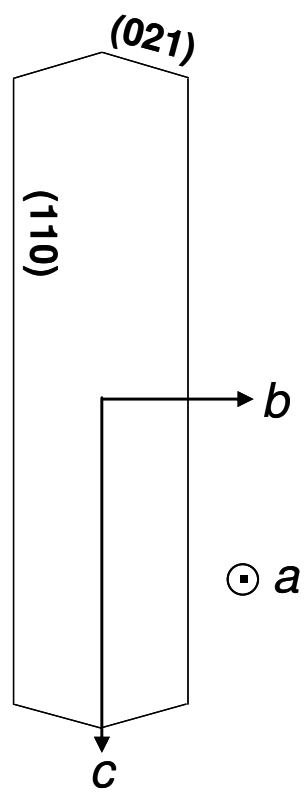

**Figure S3**
